# Supplementary material
Source: Springer Nature journal article supplement (https://www.springermedizin.de/resource/supplementary/13058_2011_2955_MOESM2_ESM.pdf/9702982)

**A. Vitamin D severe deficiency (25OHD <10 ng/ml)**

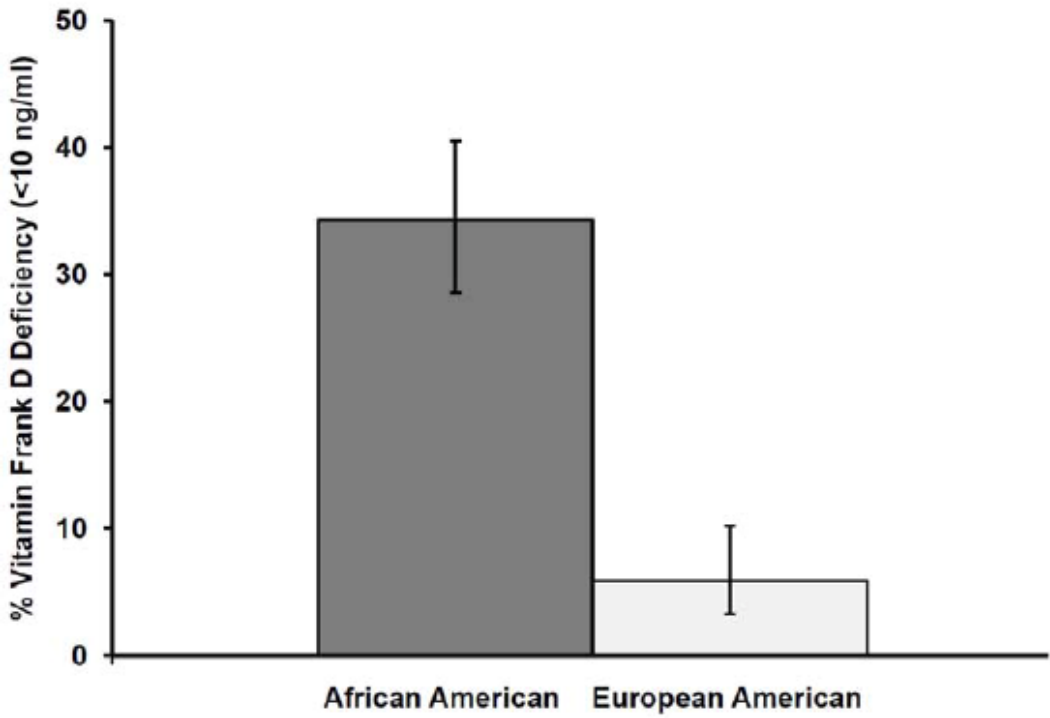

25OHD levels,  
means  $\pm$  standard  
error (ng/ml):

14.9  $\pm$  0.5

21.4  $\pm$  0.6

p<0.001

**B. Vitamin D receptor (VDR) expression in HapMap lymphoblastoid cell lines**

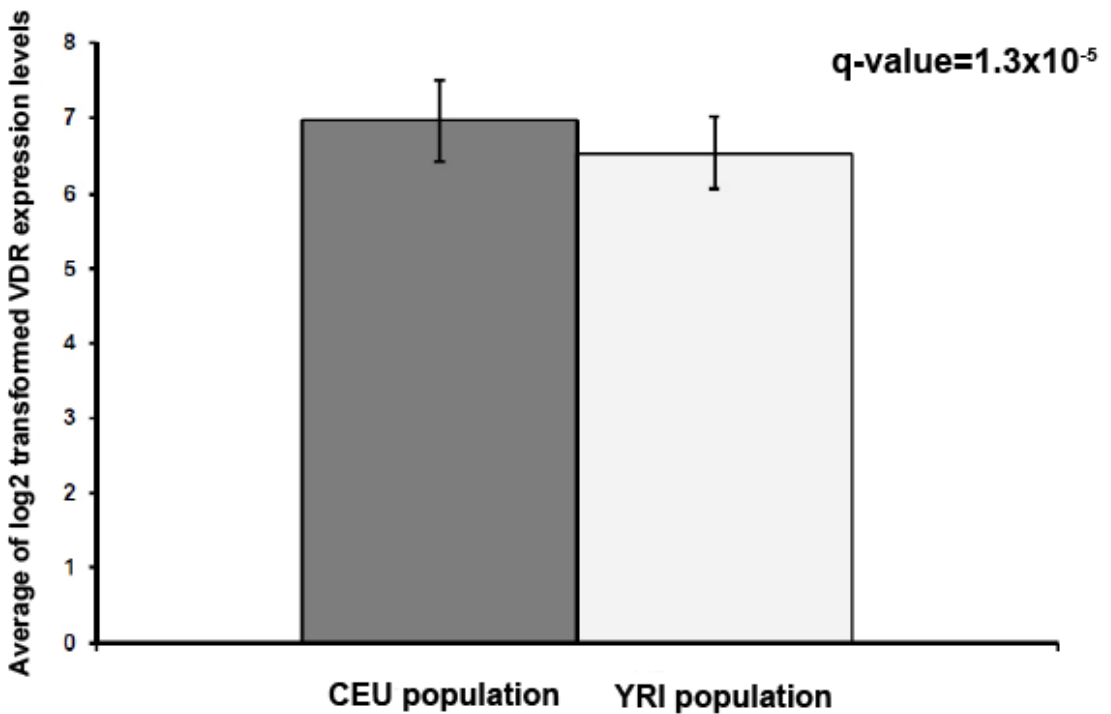

Supplement: MOESM2 [file 9702982]
